# Supplementary material for: Low-Dose rIL-15 Protects from Nephrotoxic Serum Nephritis via CD8+ T Cells
Source: MDPI journal article supplement (doi:10.3390/cells11223656), 2022-11-18
Supplement: s1 [file s1]

# Low-dose rIL-15 protects from nephrotoxic serum nephritis via CD8<sup>+</sup> T cells

Agnes A. Mooslechner <sup>1</sup>, Max Schuller <sup>1</sup>, Katharina Artinger <sup>1</sup>, Alexander H. Kirsch <sup>1</sup>, Corinna Schabhüttl <sup>1</sup>, Philipp Eller <sup>2</sup>, Alexander R. Rosenkranz <sup>1</sup>, Kathrin Eller <sup>1,\*</sup>

<sup>1</sup> Division of Nephrology, Department of Internal Medicine, Medical University of Graz, 8036 Graz, Austria

<sup>2</sup> Intensive Care Unit, Department of Internal Medicine, Medical University of Graz, 8036 Graz, Austria

\* Correspondence: kathrin.eller@medunigraz.at (KE)

## Table of contents

Figure S1. Serum blood urea nitrogen, autologous antibody response, immune cell quantification in the spleen and peripheral blood in mice 7 days after NTS induction treated with low-dose rIL-15 or vehicle.

Figure S2. Quantification of CD8 memory subpopulations in the kidney, purity of transferred CD8 T cells, gene expression of T cell transcription factors in the kidney of mice 7 days after NTS induction treated with low-dose rIL-15 or vehicle. Autologous antibody response and iNKT cell quantification in kidney tissue in *CD8 $\alpha$ <sup>-/-</sup>* mice 7 days after NTS induction and treated with or without rIL-15.

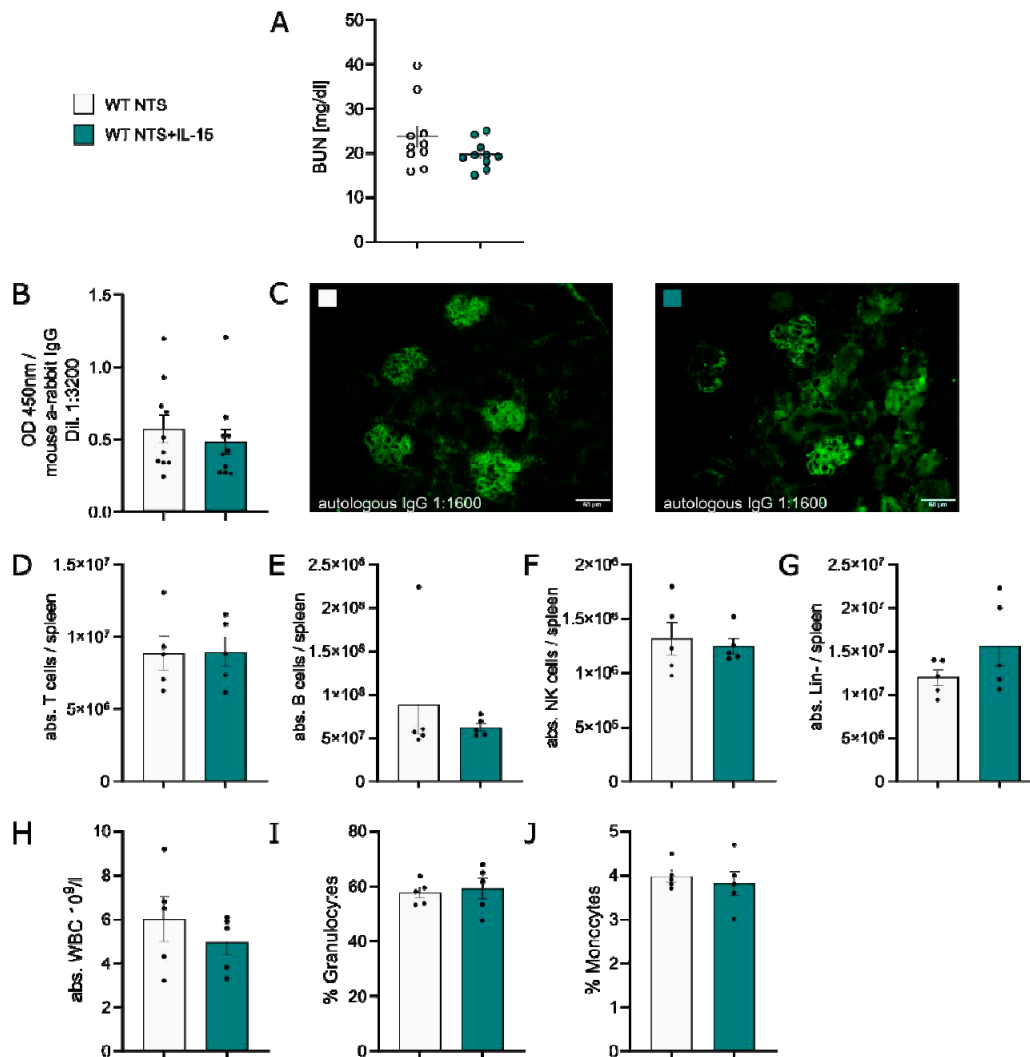

**Figure S1.** Serum blood urea nitrogen, autologous antibody response, immune cell quantification in the spleen and peripheral blood in mice 7 days after NTS induction treated with low-dose rIL-15 or vehicle. Data represent day 7 of NTS. **(A)** Quantification of blood urea nitrogen in serum. **(B)** Optical density of circulating mouse anti-rabbit IgG in serum and **(C)** representative staining of autologous IgG deposits in kidney tissue. Quantification of **(D)** CD45<sup>+</sup>CD3<sup>+</sup>CD90.2<sup>+</sup> T cells, **(E)** CD45<sup>+</sup>CD19<sup>+</sup> B cells, **(F)** CD45<sup>+</sup>NK1.1<sup>+</sup> NK cells, and **(G)** CD45<sup>+</sup>CD19<sup>+</sup>CD3<sup>+</sup>CD90.2<sup>+</sup> NK1.1<sup>+</sup> Lineage negative cells in spleen. **(H)** White blood cell count and analysis of **(I)** granulocyte and **(J)** monocyte frequencies in peripheral blood. Statistical analysis used was Student's t-test or Mann-Whitney test. All data are mean  $\pm$  SEM.

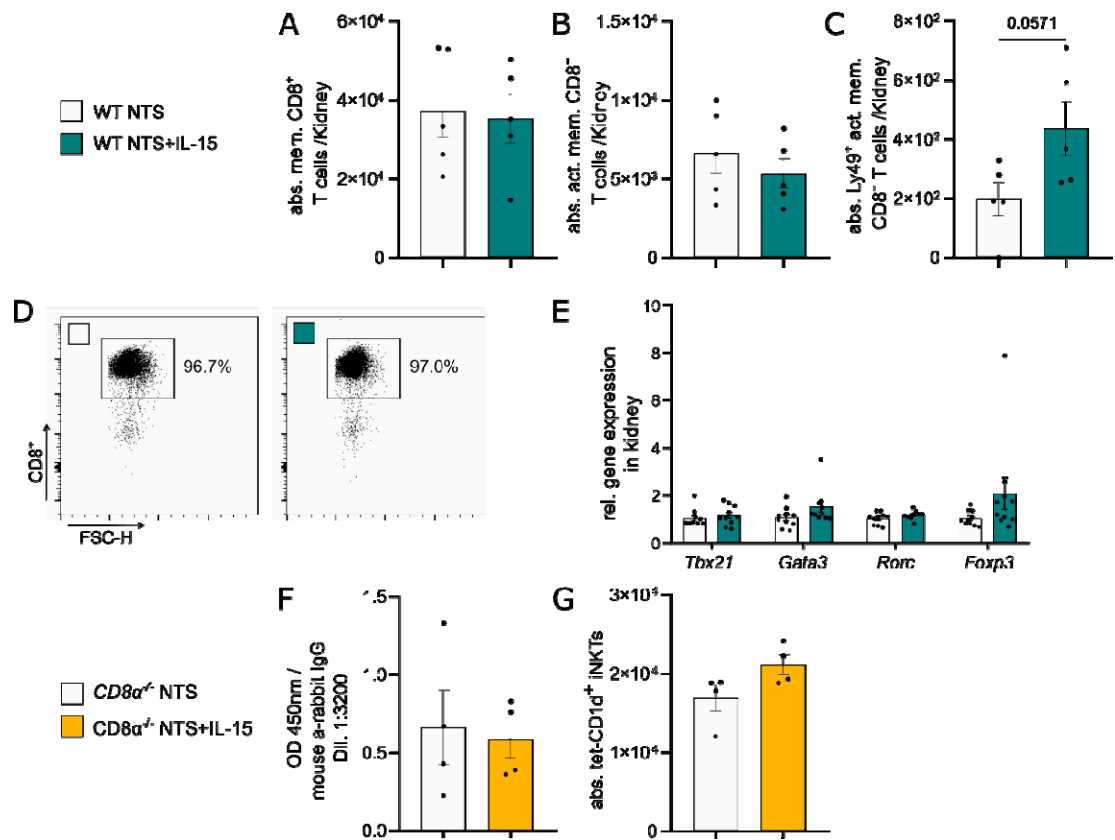

**Figure S2.** Quantification of CD8 memory subpopulations in the kidney, purity of transferred CD8 T cells, gene expression of T cell transcription factors in the kidney of mice 7 days after NTS induction treated with low-dose rIL-15 or vehicle. Autologous antibody response and iNKT cell quantification in kidney tissue in *CD8α<sup>-/-</sup>* mice 7 days after NTS induction and treated with or without rIL-15. Data represent day 7 of NTS. Quantification of (A) CD44<sup>+</sup>CD8<sup>+</sup> memory T cells, (B) CD122<sup>+</sup> memory CD8<sup>+</sup> T cells, and (C) Ly49<sup>+</sup>CD122<sup>+</sup> memory CD8<sup>+</sup> T cells in kidney tissue. (D) Dot plots showing purity of sorted CD8α<sup>+</sup> cells from lymph nodes of NTS mice treated with control or IL-15, used for gene expression studies. Plots represent concatenated data of all samples per group. (E) Relative gene expression of *Tbx21*, *Gata3*, *Rorc*, and *Foxp3* in kidney tissue. (F) Optical density of circulating mouse anti-rabbit IgG in serum and quantification of (G) CD45<sup>+</sup>CD19<sup>-</sup>CD3<sup>-</sup>tet-CD1d<sup>+</sup> iNKT cells in kidney tissue of *CD8α<sup>-/-</sup>* mice. Statistical analysis used was Student's t-test or Mann-Whitney test. All data are mean ± SEM.
